# Supplementary material
Source: MDPI journal article supplement (https://www.mdpi.com/2073-4344/12/11/1327)
Supplement: s1 [file s1]

# Photo-Induced Holes Initiating Peroxymonosulfate Oxidation for Carbamazepine Degradation via Singlet Oxygen

Yifei Qi <sup>1</sup>, Xiaoyue Zhou <sup>1</sup>, Zhenjie Li <sup>1</sup>, Renli Yin <sup>1,\*</sup>, Junhao Qin <sup>1</sup>, Huashou Li <sup>1</sup>, Wanqian Guo <sup>2</sup>, Adela Jing Li <sup>1,\*</sup> and Rongliang Qiu <sup>1</sup>

<sup>1</sup> Guangdong Provincial Key Laboratory of Agricultural & Rural Pollution Abatement and Environmental Safety, College of Natural Resources and Environment, South China Agricultural University, Guangzhou 510642, China

<sup>2</sup> State Key Laboratory of Urban Water Resource and Environment, School of Environment, Harbin Institute of Technology, Harbin 150090, China

\* Correspondence: yinrenli@scau.edu.cn (R.Y.); jing.li@scau.edu.cn (A.J.L.)

## Text S1 Methods of solid phase extraction.

The samples were extracted with a Waters' solid phase extraction column. Firstly, the solid phase extraction column was connected to a disposable syringe, and 4 mL of MeOH and 4 mL of high purity water were added to the syringe to activate the solid phase extraction column in turn, and the rate of water sample flowing from the column was kept at 4 mL/min; then the reaction liquid was gradually added to the syringe and slowly squeezed into the solid phase extraction column for extraction, and the rate of water sample should not exceed 4 mL/min. After the sample extraction was completed, the column was washed with 4 mL of high-purity water; then the column was removed, dried, and dehydrated by centrifugation at 8000 rpm/min for 2 min; then the analytes were eluted with 4 mL of MeOH into a test tube. On this basis, the obtained sample was nitrogen blown under N<sub>2</sub> gas stream to a volume of less than 1 mL to obtain a sample of the purified and concentrated intermediate product; finally, the sample was loaded into a brown chromatography vial for determination of the extracted product of CBZ using LC-TOF-MS (Uplc 1290-6540B Q-TOF).

**Table S1** Compounds identified by LC-MS during the photocatalytic degradation of CBZ under visible light irradiation.

| Products | R <sub>t</sub> (min) | Formula                                                       | ESI<br>mode | Experimental<br>mass (m/z) | Calculated<br>mass<br>(m/z) |
|----------|----------------------|---------------------------------------------------------------|-------------|----------------------------|-----------------------------|
| A        | 5.58                 | C <sub>15</sub> H <sub>12</sub> N <sub>2</sub> O <sub>2</sub> | Positive    | 253.0974                   | 253.0902                    |
| B        | 5.58                 | C <sub>15</sub> H <sub>12</sub> N <sub>2</sub> O <sub>2</sub> | Positive    | 253.0974                   | 253.0902                    |
| C        | 5.58                 | C <sub>15</sub> H <sub>12</sub> N <sub>2</sub> O <sub>2</sub> | Positive    | 253.0974                   | 253.0902                    |
| D        | 5.43                 | C <sub>15</sub> H <sub>14</sub> N <sub>2</sub> O <sub>3</sub> | Positive    | 271.1077                   | 271.1004                    |
| E        | 5.25                 | C <sub>15</sub> H <sub>12</sub> N <sub>2</sub> O <sub>3</sub> | Positive    | 269.0921                   | 269.0848                    |
| F        | 2.03                 | C <sub>14</sub> H <sub>9</sub> NO <sub>2</sub>                | Positive    | 224.0707                   | 227.0634                    |
| G        | 5.25                 | C <sub>15</sub> H <sub>12</sub> N <sub>2</sub> O <sub>3</sub> | Positive    | 271.1077                   | 271.1004                    |
| H        | 6.94                 | C <sub>13</sub> H <sub>9</sub> NO                             | Positive    | 196.0755                   | 196.0683                    |
| I        | 4.38                 | C <sub>13</sub> H <sub>9</sub> N                              | Positive    | 180.0807                   | 180.0734                    |
| J        | 4.28                 | C <sub>7</sub> H <sub>7</sub> NO                              | Positive    | 138.0556                   | 138.0484                    |

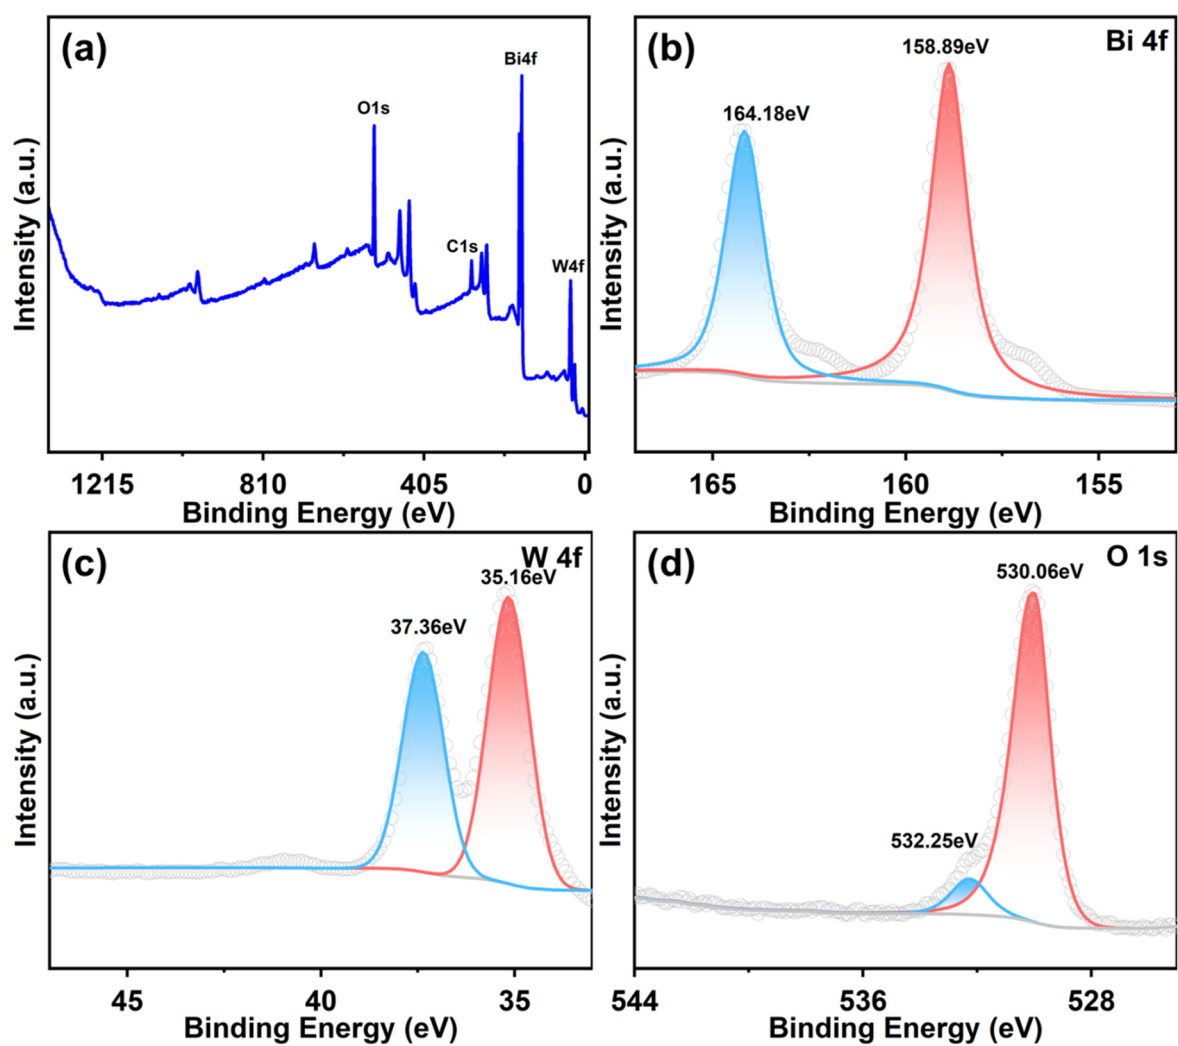

**Figure S1.** Survey XPS spectrum of the  $\text{Bi}_2\text{WO}_6$  sample (a), high-resolution XPS spectra of (b) Bi 4f, (c) W 4f and (d) O 1s for the  $\text{Bi}_2\text{WO}_6$  sample.

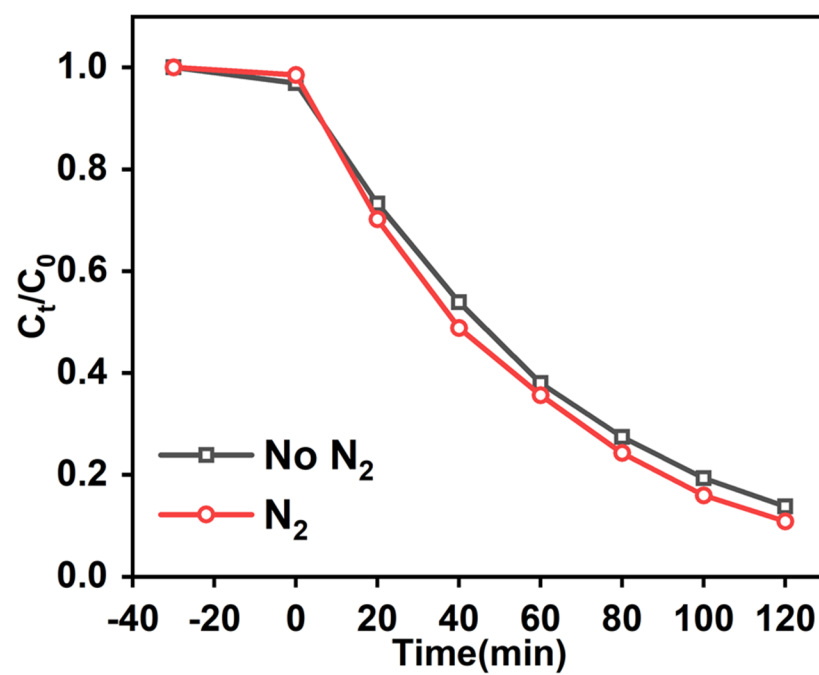

**Figure S2.** The degradation of CBZ in the VL/Bi<sub>2</sub>WO<sub>6</sub>/PMS system under N<sub>2</sub> purge.
